# Supplementary material for: Chronic oxytocin administration stimulates the oxytocinergic system in children with autism
Source: Springer Nature journal article supplement (doi:10.1038/s41467-023-44334-4), 2024-01-02
Supplement: MOESM1 [file 41467_2023_44334_MOESM1_ESM.pdf]

# Supplementary Material

## Chronic oxytocin administration stimulates the oxytocinergic system in children with autism

Matthijs Moerkerke\*<sup>1,2</sup>, Nicky Daniels\*<sup>2,3</sup>, Laura Tibermont<sup>1,2</sup>, Tiffany Tang<sup>1,2</sup>, Margaux Evenepoel<sup>2,3</sup>,  
Stephanie Van der Donck<sup>1,2</sup>, Edward Debbaut<sup>1,2</sup>, Jellina Prinsen<sup>2,3</sup>, Viktoria Chubar<sup>4</sup>, Stephan Claes<sup>4</sup>, Bart  
Vanaudenaerde<sup>5</sup>, Lynn Willems<sup>5</sup>, Jean Steyaert<sup>1,2</sup>, Bart Boets<sup>†,1,2</sup>, Kaat Alaerts<sup>†,2,3</sup>

<sup>1</sup> Center for Developmental Psychiatry, Department of Neurosciences, KU Leuven, Leuven, Belgium

<sup>2</sup> Leuven Autism Research (LAuRes), KU Leuven, Leuven, Belgium

<sup>3</sup> Research Group for Neurorehabilitation, Department of Rehabilitation Sciences, KU Leuven, Leuven, Belgium

<sup>4</sup> University Psychiatric Centre, KU Leuven, Leuven, Belgium

<sup>5</sup> Laboratory of Respiratory Diseases and Thoracic Surgery, Department of Chronic Illness and Metabolism, KU Leuven, Leuven, Belgium

\* These authors contributed equally

† These authors jointly supervised this work

## Behavioural measures

**Table S1. Detailed description of the adopted behavioural measures.**

| <b>Outcome measures</b>                                                                      | <b>Construct</b>                  | <b>Type of report</b>         | <b>Meaning of higher scores</b>                                | <b>Reference</b>                                                            |
|----------------------------------------------------------------------------------------------|-----------------------------------|-------------------------------|----------------------------------------------------------------|-----------------------------------------------------------------------------|
| <b>Social Responsiveness Scale-Children (SRS-2)</b>                                          | Symptom severity                  | Parent-reported questionnaire | Greater deficits in social responsiveness                      | Constantino & Gruber, 2012 <sup>1</sup> ; Roeyers et al., 2015 <sup>2</sup> |
| <b>Autism Diagnostic Observation Schedule (ADOS-2)</b>                                       | Symptom severity                  | Observation                   | More severe symptoms of autism spectrum disorder               | Lord et al., 2012 <sup>3</sup>                                              |
| <b>Wechsler Intelligence Scale for Children (WISC-V-NL)</b>                                  | Verbal Intelligence Quotient      | Observation                   | Higher verbal abilities                                        | Wechsler, 2018 <sup>4</sup>                                                 |
|                                                                                              | Performance Intelligence Quotient |                               | Higher visual spatial abilities                                |                                                                             |
| <b>Screen for Child Anxiety Related Emotional Disorders (SCARED-NL)</b>                      | Anxiety                           | Parent-reported questionnaire | Higher risk for anxiety disorders                              | Muris et al., 2007 <sup>5</sup>                                             |
| <b>Attachment Style Classification Questionnaire (ASCQ)</b><br>Anxious<br>Avoidant<br>Secure | Attachment                        | Self-reported questionnaire   | More anxious, avoidant or secure attachment toward their peers | Finzi et al., 2000 <sup>6</sup>                                             |

## Supplementary result

**Figure S1. Effect of chronic oxytocin administration on *OXTR* DNAm levels at CpG sites -914 and -934.** Visualisation of the salivary *OXTR* DNAm levels at CpG -914 and -934 for each nasal spray group (oxytocin and placebo) at each assessment session (T0:  $n_{\text{oxytocin}} = 38$ ,  $n_{\text{placebo}} = 39$ ; T1:  $n_{\text{oxytocin}} = 37$ ,  $n_{\text{placebo}} = 38$ ; T2:  $n_{\text{oxytocin}} = 38$ ,  $n_{\text{placebo}} = 37$ ). Data are presented as mean values, vertical bars denote standard errors.

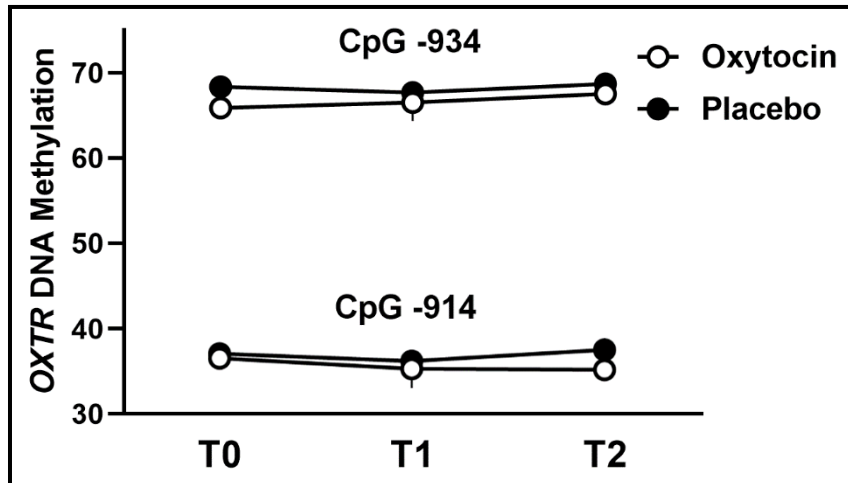

## Supplementary references

1. Constantino, J. & Gruber, C. *Social responsiveness scale 2nd. ed: SRS-2. Manual. Western Psychological Services.* (2012).
2. Roeyers, H., Thys, M., Druart, C., de Schryver, M. & Schittekatte, M. Nederlandse bewerking van de SRS-2. *Amsterdam: Hogrefe Uitgevers.* (2015).
3. Lord, C. *et al.* ADOS-Autisme diagnostisch observatieschema Handleiding. (2012).
4. Wechsler, D. WISC-V-NL. Wechsler Intelligence Scale for Children, Fifth Edition, Dutch version. Preprint at (2018).
5. Muris, P., Bodden, D., Hale, W., Birmaher, B. & Mayer, B. SCARED-NL. Vragenlijst over angst en bang-zijn bij kinderen en adolescenten. Handleiding bij de gereviseerde Nederlandse versie van de Screen for Child Anxiety Related Emotional Disorders. Preprint at (2007).
6. Finzi, R., Cohen, O., Sapir, Y. & Weizman, A. Attachment Styles in Maltreated Children: A Comparative Study. *Child Psychiatry and Human Development* 2000 31:2 **31**, 113–128 (2000).
